# Supplementary material
Source: publisher figshare collection journal article supplement (https://tandf.figshare.com/ndownloader/files/12784535)
Supplement: Supplementary file 1 [file 12784535]

***Table 1***

| **ANTIBODIES** | **Dilution** | **SOURCE** | **IDENTIFIERS** | **Use** |
| --- | --- | --- | --- | --- |
| Rabbit anti-IRE1α | 1 :1000 | Cell Signaling Technology | #3294S | IP, WB, IF, PLA |
| Goat anti-RNH1 | 1 :500 | Abnova | #H00006050-M07 | WB |
| Mouse anti-RNH1 | 1 :1000 | Santa Cruz | #271725 | IP, WB, IF, PLA |
| Goat anti-BiP | 1 :2000 | Santa Cruz | #Sc-1050 | WB |
| Rabbit anti-EDEM1 | 1 :1000 | Abcam | #Ab55920 | WB |
| Goat anti-Lamin | 1 :1000 | Santa Cruz | #Sc-6217 | WB |
| Mouse anti-PAN-H3 | 1 :1000 | Active Motif | #39763 | WB |
| Rabbit anti-LC3B | 1 :1000 | Cell Signaling Technology | #2775 | WB |
| Rabbit anti-Actin | 1 :5000 | Sigma-Aldrich | #A2066 | WB |
| Chicken anti-goat Alexa 488 | 1 :200 | Invitrogen | #A21467 | IF |
| Donkey anti-mouse Alexa 555 | 1 :200 | Invitrogen | # A31570 | IF |
| Anti-goat HRP | 1 :20000 | Abcam | #Ab97110 | WB |
| Anti-rabbit HRP | 1 :10000 | Cell Signaling Technology | #7074 | WB |
| Anti-mouse HRP | 1 :10000 | Dako | #P0260 | WB |

***Table 2***

| **Primers** | **Forward (5’- 3’)** | **Reverse (5’- 3’)** |
| --- | --- | --- |
| BiP | GGTGAAAGACCCCTGACAAA | GTCAGGCGATTCTGGTCATT |
| RNH1 | GTCCTGTCCAGCACACTACG | GCCGAGAGGCTGCAATACT |
| RPL13A | CCTGGAGGAGAAGAGGAAAGAGA | GAGGACCTCTGTGTATTTGTCAA |
| XBP1 fragment analysis | HEX-GGAGTTAAGACAGCGCTTGG | GAGATGTTCTGGAGGGGTGA |
| XBP1 stem loop | 5’-/56-FAM/CAGUCCGCAGCACUG/3IABkFQ/-3’ | |
